# Supplementary material for: Safety and efficacy of current sclera fixation methods for intraocular lenses
Source: Research Square preprint supplement (doi:10.21203/rs.3.rs-477765/v1), 2021-05-05
Supplement: Supplementary file 1 [file cbb1583836c89025c8bf2069.docx]

| **Table 2** Follow-up time and intraoperative complications | | | | | |
| --- | --- | --- | --- | --- | --- |
| **IOL type** | **IOL design** | **Number of IOLs** | **FU [days] arithmetic mean [min. - max.]** | **Sclera fixation** | **Intraoperative complications** |
| Alcon SA60AT | 1-pc, loop | 1 | 141 [n/a] | Prolene (1x) | none |
| Bausch and Lomb Akreos Adapt | 1-pc, plate | 10 | 441 [54 - 964] | GoreTex (7x), Prolene (2x) | reduced insight (1x), contorted iris (1x) |
| Bausch and Lomb EnVista MX60P | 1-pc, loop | 1 | 101 [n/a] |  | additional sclerafixation suture needed because of tilted IOL (1x) |
| Bausch and Lomb Eye-Cee | 1-pc, loop | 4 | 184 [44 - 388] | Yamane (4x) | none |
| Kowa AvanseePresetUV | 3-pc, loop | 11 | 157 [20 - 899] | Prolene (1x), Yamane (10x) | PCR during initial in-the-bag implantation (1x) |
| Ophtec Aniridie HMK ANI 2 Model 311 | 1-pc, plate | 1 | 637 [*n/a*] | GoreTex (1x) | rupture of initially used Prolene suture (1x) |
| Staar Surgical KS-Xs | 3-pc, loop | 5 | 158 [60 - 418] | Prolene (1x), Yamane (4x) | none |
| Zeiss AT Lisa tri toric 939MP | 1-pc, plate | 1 | 176 [*n/a*] | Prolene (1x) | none |
| Zeiss AT Torbi 709M | 1-pc, plate | 1 | 132 [*n/a*] | Prolene (1x) | none |
|  | | | | | |
| *refixation (unknown IOL types)* | [*n/a*] | 22 | 279 [97 - 693] | GoreTex (6x), Prolene (12x), Yamane (4x) | none |
|  | | | | | |
| *Legend:* | *1-pc, single piece IOL design; 3-pc, three-piece IOL design; FU, follow-up time; IOL, intraocular lens; loop, loop IOL haptics design; n/a, not applicable; pc, piece; pcr, posterior lens capsule rupture; plate, plate IOL haptics design* | | | | |
